# Supplementary material for: A Polyzwitterionic@MOF Hydrogel with Exceptionally High Water Vapor Uptake for Efficient Atmospheric Water Harvesting
Source: MDPI journal article supplement (doi:10.3390/molecules29081851), 2024-04-18
Supplement: s1 [file s1]

# Supporting information (SI)

## A Polyzwitterionic@MOF Hydrogel with Exceptionally High Water Vapor Uptake for Efficient Atmospheric Water Harvesting

Jian Yan, Wenjia Li, Yingyin Yu, Guangyu Huang, Junjie Peng, Daofei Lv, Xin Chen, Xun Wang \* and Zewei Liu \*

School of Environment and Chemical Engineering, Foshan University, Foshan 528000, China; yanjian@fosu.edu.cn (J.Y.); liwenjia2024@163.com (W.L.); yuyingyin946@163.com (Y.Y.); hgy2024@163.com (G.H.); cepengjunjie@fosu.edu.cn (J.P.); lvdaofei@163.com (D.L.); chenxin@fosu.edu.cn (X.C.)

\* Correspondence: cexunwang@fosu.edu.cn (X.W.); liuzewei@fosu.edu.cn (Z.L.)

### Contents

- S1. Water vapor adsorption isotherms on pure LiCl, PL-3 and PML hydrogels
- S2. Optical photographs of PL hydrogels after adsorption-desorption cycle
- S3. Thermogravimetric curves of PML hydrogel before and after adsorption-desorption cycle
- S4. N<sub>2</sub> adsorption test and water adsorption isotherm of MIL-101(Cr)
- S5. Comparison of the swelling ratio of the hydrogels and other materials
- S6. Comparison of the water capacity of the hydrogels and other materials

## S1. Water vapor adsorption isotherms on pure LiCl, PL-3 and PML hydrogels

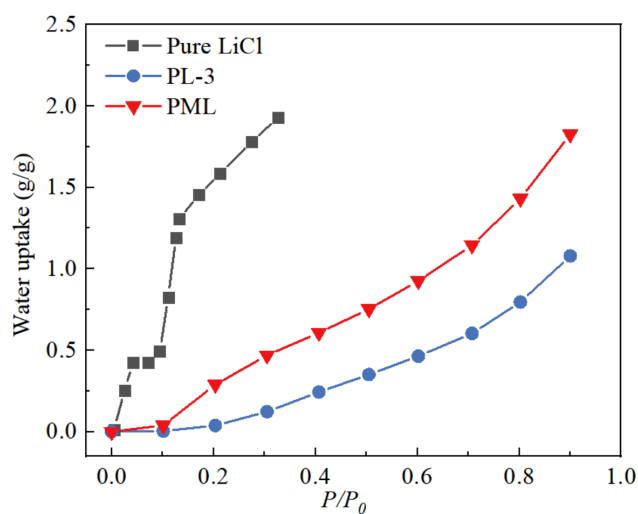

**Figure S1.** Water vapor adsorption isotherms on pure LiCl, PL-3 and PML hydrogels at 298 K.

## S2. Optical photographs of PL hydrogels after adsorption-desorption cycle

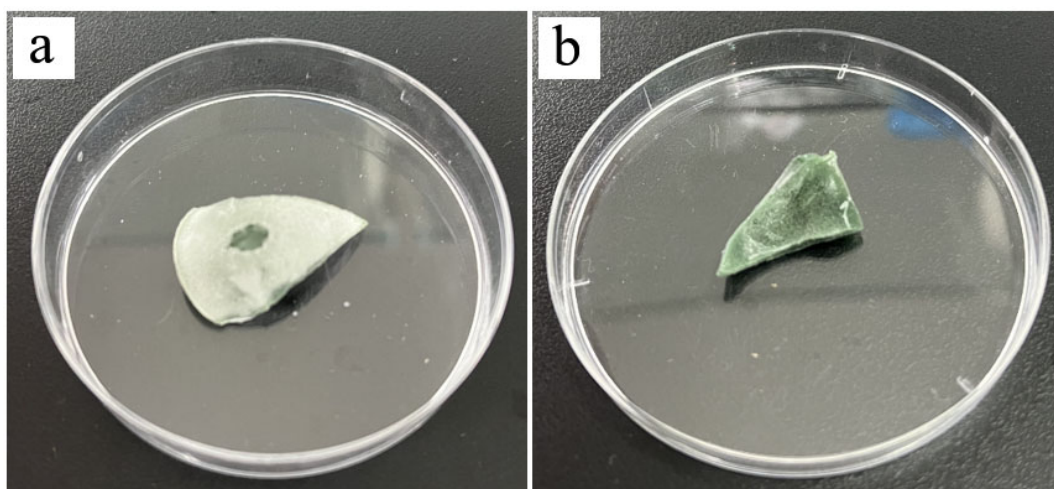

**Figure S2.** Optical photographs of (a) PL-2 and (b) PL-3 hydrogels after one adsorption-desorption cycle

### S3. Thermogravimetric and FTIR curves of PML hydrogel before and after adsorption-desorption cycle

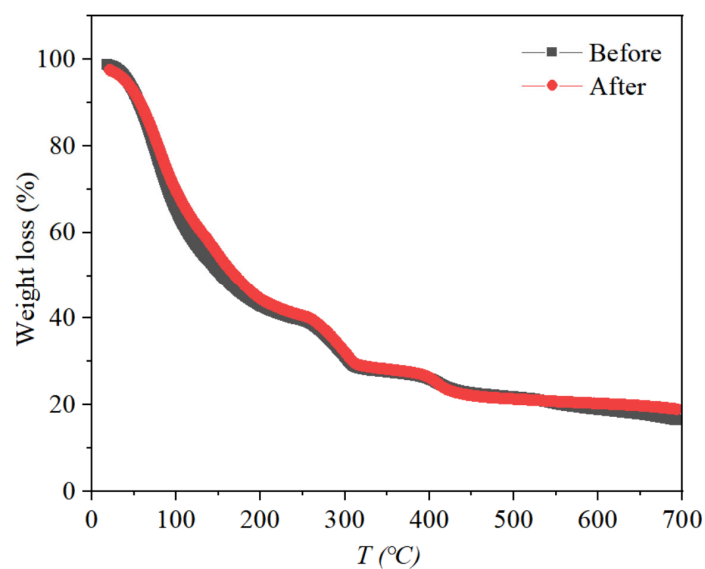

**Figure S3.** Thermogravimetric curves of PML hydrogel before and after an adsorption-desorption cycle

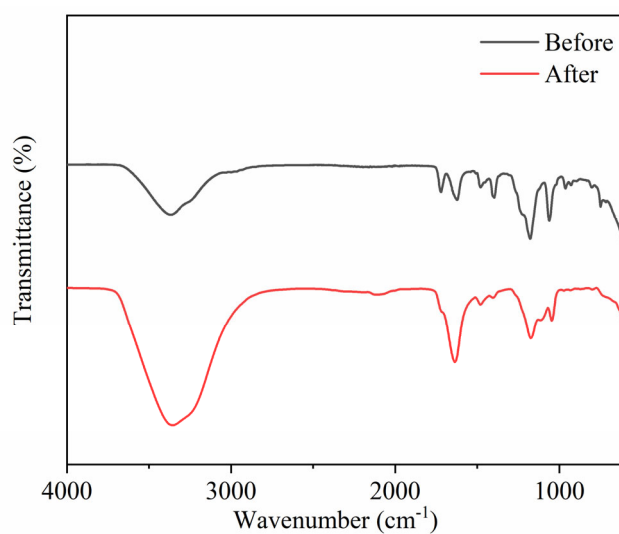

**Figure S4.** FTIR spectra of PML hydrogel before and after an adsorption-desorption cycle

#### S4. N<sub>2</sub> adsorption test and water adsorption isotherm of MIL-101(Cr)

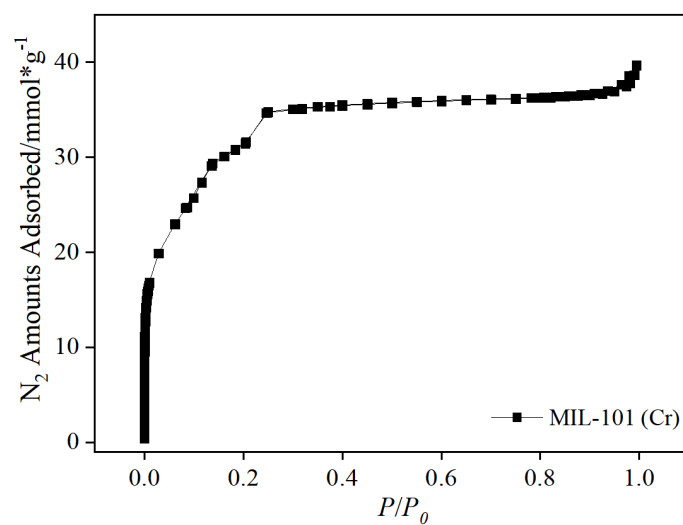

**Figure S5.** N<sub>2</sub> adsorption isotherm of MIL-101(Cr) at 298 K

**Table S1.** Pore structure parameters of MIL-101 (Cr)

| Sample      | BET<br>( $\text{m}^2/\text{g}$ ) | Langmuir ( $\text{m}^2/\text{g}$ ) | Pore Volume<br>( $\text{cm}^3/\text{g}$ ) |
|-------------|----------------------------------|------------------------------------|-------------------------------------------|
| MIL-101(Cr) | 2602                             | 3711                               | 1.25                                      |

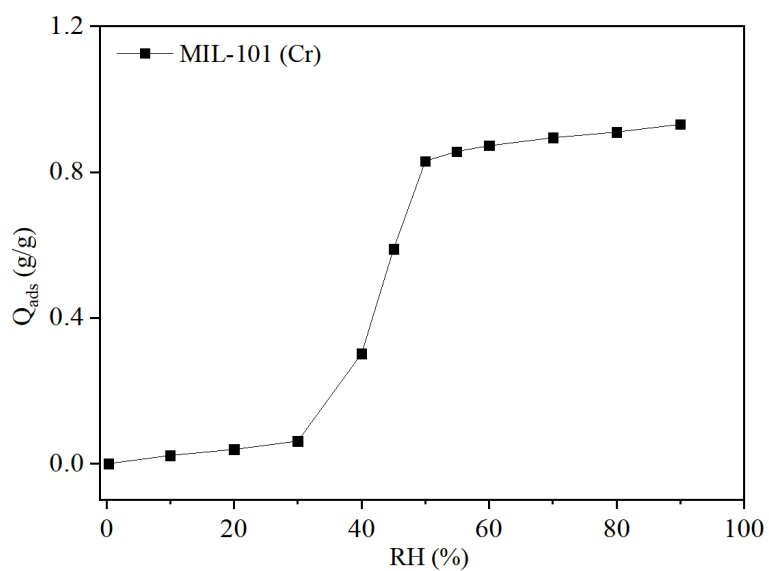

**Figure S6.** Water vapor adsorption isotherm of MIL-101(Cr) at 298 K

## S5. Comparison of the swelling ratio of the hydrogels and other materials

**Table S2.** Comparison of the swelling ratio of the hydrogels for atmospheric water harvesting in the literature

| Materials | Swelling ratio (g/g) | Swelling condition    | Reference         |
|-----------|----------------------|-----------------------|-------------------|
| PML       | 1.82                 | 90% RH moisture       | <b>This study</b> |
| PML       | 2.29                 | DI water              | <b>This study</b> |
| PML       | 9.03                 | 4 mol/L LiCl solution | <b>This study</b> |
| POG       | 1.54                 | 90% RH moisture       | [1]               |
| SMAG      | 6.3                  | 90% RH moisture       | [2]               |
| PAM-CNT   | 1.75                 | 80% RH moisture       | [3]               |

## S6. Comparison of the water capacity of the hydrogels and other materials

**Table S3.** Comparison of the water capacity of sorbents in the literature.

| Materials                 | Water vapor capacity (g/g) at RH=90%, 25°C | Water vapor capacity (g/g) at RH=30%, 25°C | Reference         |
|---------------------------|--------------------------------------------|--------------------------------------------|-------------------|
| PML                       | 1.82                                       | 0.43                                       | <b>This study</b> |
| MOF-801                   | 0.28                                       | 0.47                                       | [4]               |
| MIL-101(Cr)               | 1.52 <sup>a</sup>                          | 0.25                                       | [5]               |
| PNIPAM                    | 0.21                                       | 0.03                                       | [6]               |
| PNIPAM@MIL-101(Cr)        | 3.6                                        | 0.71                                       | [7]               |
| PNIPAM-PPy-Cl (SMAG)      | 6.5                                        | 0.70                                       | [2]               |
| PAM-CNT-CaCl <sub>2</sub> | 1.75 <sup>b</sup>                          | 0.68 <sup>c</sup>                          | [8]               |
| SHCP-10 (POPs)            | 0.76                                       | 0.21                                       | [9]               |
| 2D ep-POP                 | 0.40                                       | 0.1                                        | [10]              |
| COF-432                   | 0.31                                       | 0.025                                      | [11]              |
| COFs-480-hydrazide        | 0.47                                       | 0.33                                       | [12]              |

<sup>a</sup>:  $T_{\text{ads/des}}=30^{\circ}\text{C}$ ;

<sup>b</sup>: RH=80%;

<sup>c</sup>: RH=35%

1. Ni, F.; Qiu, N.; Xiao, P.; Zhang, C.; Jian, Y.; Liang, Y.; Xie, W.; Yan, L.; Chen, T. Tillandsia-Inspired hygroscopic photothermal organogels for efficient atmospheric water harvesting. *Angew. Chem. Int. Ed.* **2020**, *59*, 19237–19246.
2. Zhao, F.; Zhou, X.; Liu, Y.; Shi, Y.; Dai, Y.; Yu, G. Super Moisture-absorbent gels for all-weather atmospheric water harvesting. *Adv. Mater.* **2019**, *31*, 1806446.
3. Li, R.; Shi, Y.; Alsaedi, M.; Wu, M.; Shi, L.; Wang, P. Hybrid hydrogel with high water vapor harvesting capacity for deployable solar-driven atmospheric water generator. *Environ. Sci. Technol.* **2018**, *52*, 11367–11377.
4. Furukawa, H.; Gándara, F.; Zhang, Y.; Jiang, J.; Queen, W.; Hudson, M.; Yaghi, O.M. Water adsorption in porous metal-organic frameworks and related materials. *J. Am. Chem. Soc.* **2014**, *136*, 4369–4381.
5. Seo, Y.; Yoon, J.; Férey, Gérard. Porous Materials: Energy-Efficient Dehumidification over Hierarchically Porous Metal-Organic Frameworks as Advanced Water Adsorbents. *Adv. Mater.* **2012**, *24*, 806–810.
6. Karmakar, A.; Mileo, P.G.M.; Bok, I.; Peh, S.B.; Zhang, J.; Yuan, H.; Maurin, G.; Zhao, D. thermo-responsive MOF/polymer composites for temperature-mediated water capture and release. *Angew. Chem. Int. Ed.* **2020**, *59*, 11003–11009.
7. Yilmaz, G.; Meng, F.L.; Lu, W.; Abed, J.; Peh, C.K.N.; Gao, M.; Sargent, E.H.; Ho, G.W. Autonomous atmospheric water seeping MOF matrix. *Sci. Adv.* **2020**, *6*, 8605.
8. Li, R.; Shi, Y.; Alsaedi, M.; Wu, M.; Shi, L.; Wang, P. Hybrid hydrogel with high water vapor harvesting capacity for deployable solar-driven atmospheric water generator. *Environ. Sci. Technol.* **2018**, *52*, 11367–11377.
9. Schweng, P.; Mayer, F.; Galehdari, D.; Weiland, K.; Woodward, R. A Robust and Low-Cost Sulfonated Hypercrosslinked Polymer for Atmospheric Water Harvesting. *Small.* **2023**, *19*, 2304562.
10. Byun, Y.; Coskun, A. Epoxy-Functionalized Porous Organic Polymers via the Diels-Alder Cycloaddition Reaction for Atmospheric Water Capture. *Angew. Chem. Int. Ed.* **2018**, *57*, 3173–3177.
11. Nguyen, H.; Hanikel, N.; Lyle, S.; Zhu, C.; Proserpio, D.; Yaghi, O.M. A Porous Covalent Organic Framework with Voided Square Grid Topology for Atmospheric Water Harvesting. *J. Am. Chem. Soc.* **2020**, *142*, 2218–2221.
12. Nguyen, H.; Gropp, C.; Hanikel, N.; Möckel, A.; Lund, A.; Yaghi, O.M. Hydrazine-Hydrazide-Linked Covalent Organic Frameworks for Water Harvesting. *ACS Cent. Sci.* **2022**, *8*, 926–932.
